1 **Branched-Chain Amino Acid Metabolic Reprogramming Orchestrates**

2 **Drug Resistance to EGFR Tyrosine Kinase Inhibitors**

3 Yuetong Wang<sup>1,2,3,9,10</sup>, Jian Zhang<sup>1,2,3,9,10</sup>, Shengxiang Ren<sup>4,10</sup>, Dan Sun<sup>1,2,3,10</sup>, Hsin-Yi  
4 Huang<sup>1,2,3</sup>, Hua Wang<sup>1,2,3</sup>, Yujuan Jin<sup>1,2,3</sup>, Fuming Li<sup>1,2,3</sup>, Chao Zheng<sup>1,2,3</sup>, Liu Yang<sup>1,2,3</sup>, Lei  
5 Deng<sup>5</sup>, Zhonglin Jiang<sup>1,9</sup>, Tao Jiang<sup>4</sup>, Xiangkun Han<sup>1,2,3</sup>, Shenda Hou<sup>1,2,3</sup>, Chenchen  
6 Guo<sup>1,2,3,9</sup>, Fei Li<sup>1,2,3</sup>, Dong Gao<sup>1,2,3</sup>, Jun Qin<sup>2,6,9</sup>, Daming Gao<sup>1,2,3</sup>, Luonan Chen<sup>1,2,3</sup>,  
7 Kwok-Kin Wong<sup>7</sup>, Cheng Li<sup>5,\*</sup>, Liang Hu<sup>1,2,3,\*</sup>, Caicun Zhou<sup>4,\*</sup>, Hongbin Ji<sup>1,2,3,4,8,9,11\*</sup>

8 <sup>1</sup>State Key Laboratory of Cell Biology,

9 <sup>2</sup>CAS center for Excellence in Molecular Cell Science,

10 <sup>3</sup>Innovation Center for Cell Signaling Network,

11 Institute of Biochemistry and Cell Biology, Shanghai Institutes for Biological Sciences,  
12 Chinese Academy of Sciences, Shanghai, 200031, China

13 <sup>4</sup>Shanghai Pulmonary Hospital, Tongji University School of medicine, Shanghai, 200433,  
14 China

15 <sup>5</sup>School of Life Sciences, Peking University, Beijing, 100871, China

16 <sup>6</sup>Key Laboratory of Stem Cell Biology, Institute of Health Sciences, Shanghai Institutes for  
17 Biological Sciences, Chinese Academy of Sciences, Shanghai, 200031, China

18 <sup>7</sup> Department of Medical Oncology, Dana-Farber Cancer Institute, Boston, Massachusetts  
19 02215, USA

20 <sup>8</sup>School of Life Science and Technology, Shanghai Tech University, Shanghai, 200120,  
21 China

22 <sup>9</sup>University of Chinese Academy of Sciences, Beijing, 100049, China

23 <sup>10</sup>These authors contributed equally

24 <sup>11</sup>Lead Contact

25 \*Correspondence: lch3000@gmail.com (C.L.), liang.hu@sibcb.ac.cn (L.H.),  
26 caicunzhou@aliyun.com (C.Z.), hbji@sibcb.ac.cn (H.J.)

## 27 **SUMMARY**

28 Drug resistance is a significant hindrance to effective cancer treatment. Although  
29 resistance mechanisms of epidermal growth factor receptor (EGFR)-mutant cancer cells to  
30 lethal EGFR tyrosine kinase inhibitors (TKI) treatment have been investigated intensively,  
31 how cancer cells orchestrate adaptive response under sublethal drug challenge remains  
32 largely unknown. Here we find that 2-hour sublethal TKI treatment elicits a transient  
33 drug-tolerant state in EGFR-mutant lung cancer cells. Continuous sublethal treatment  
34 reinforces this tolerance and eventually establishes long-term TKI resistance. This adaptive  
35 process involves H3K9 demethylation-mediated epigenetic upregulation of branched-chain  
36 amino acid aminotransferase 1 (BCAT1) and subsequent metabolic reprogramming, which  
37 promotes TKI resistance through attenuating reactive oxygen species (ROS) accumulation.  
38 Combinational treatment with TKI and ROS-inducing reagents overcomes this drug  
39 resistance in preclinical mouse models. Clinical information analyses support the  
40 correlation of BCAT1 expression with EGFR TKI response. Collectively, our findings reveal  
41 the importance of epigenetically regulated BCAT1-engaged metabolism reprogramming in  
42 TKI resistance in lung cancer.

## 43 **HIGHLIGHTS**

44 Sublethal EGFR TKI treatment induces transient drug-tolerant state and long-term  
45 resistance in EGFR-mutant lung cancer cells

46 Epigenetically regulated BCAT1-mediated metabolic reprogramming orchestrates EGFR  
47 TKI-induced drug resistance

48 Combinational treatment with TKI and ROS-inducing agents overcomes the drug  
49 resistance induced by EGFR TKI treatment

50

## 51 INTRODUCTION

52 Cancer cells are notorious for its strong plasticity in response to cytotoxic stress. They  
53 may modulate adaptive programs to survive during therapy (Holohan et al., 2013). Upon  
54 lethal EGFR TKI exposure, drug-sensitive cancer cells initially undergo drastic apoptotic  
55 cell death resulting in notable tumor regression; however, the remaining drug-tolerant cells  
56 can follow distinct evolutionary paths and eventually acquire resistance through mutation or  
57 non-mutation mechanisms (Hata et al., 2016). However, little is known about how cancer  
58 cells orchestrate their adaptive response under sublethal TKI challenge.

59 Epigenetic alterations are one of the major mechanisms underlying the adaptation of  
60 cancer cells to drug exposure (Easwaran et al., 2014). Epigenetic changes such as H3K4  
61 demethylation or H3K9 and H3K27 methylation has been linked to lethal EGFR TKI  
62 induced resistance (Guler et al., 2017; Sharma et al., 2010).

63 Under stressful conditions, cancer cells can reprogram cellular metabolism to support  
64 their malignant phenotypes including proliferation, invasion and resistance to drug therapy  
65 (Vander Heiden and DeBerardinis, 2017). Recently, Aberrant branched-chain amino acids  
66 (BCAAs) metabolism has recently been implicated in various human malignancies  
67 including leukemia, liver cancer, pancreatic cancer and non-small cell lung cancer  
68 (Ananieva and Wilkinson, 2018; Ericksen et al., 2019; Hattori et al., 2017; Mayers et al.,  
69 2016). In addition, global metabolic changes including BCAAs catabolism alteration is  
70 observed in lung adenocarcinoma cells during 9 days of lethal EGFR TKI treatment  
71 (Thiagarajan et al., 2016). In particular, growing evidence has highlighted an essential role  
72 for BCAT1, a cytosolic aminotransferase that catalyzes the catabolism of BCAAs, in  
73 promoting cancer progression (Hattori et al., 2017; Thewes et al., 2017; Tonjes et al., 2013).  
74 However, whether BCAT1-mediated metabolic program is involved in EGFR TKI-induced  
75 drug resistance remains unclear.

76 Here, we demonstrate that sublethal EGFR TKI exposure for 2 hours elicits a transient  
77 drug-tolerant state in human EGFR-mutant lung cancer cells. Such short-term tolerance

78 could be reinforced by continuous sublethal TKI treatment and eventually establish  
79 long-term drug resistance. Mechanistically, we demonstrate that this drug resistance is  
80 potentially mediated through BCAT1-mediated metabolic reprogramming via epigenetic  
81 regulation.

82

## 83 RESULTS

### 84 Sublethal EGFR TKI Treatment Induces Transient and Long-Term Resistance

85 To identify a suitable sublethal EGFR TKI dose, we treated the EGFR-mutant lung  
86 cancer cell line PC9 with different drug concentrations and found that 10nM gefitinib (GEF)  
87 treatment effectively blocked the activation of EGFR without inducing a significant cell  
88 apoptosis, whereas drug concentration over 100nM triggered overt apoptosis (Figure 1A-B  
89 and S1A). Thus we employed this sublethal dose for further study. We performed the  
90 short-term sublethal treatment experiments: cancer cells were exposed to sublethal TKI for  
91 2 hours (hrs) followed by recovery in drug-free medium for different time intervals before  
92 re-exposed to higher doses of TKI for 0.5 hr; then cells were cultured in drug-free medium  
93 for additional 72 hrs before MTT assay (Figure 1C). Notably, sublethal GEF pre-treatment  
94 rendered PC9 cells more tolerant to ensued higher doses of GEF treatment (Figure 1D).  
95 Similar drug-tolerance state was also observed in other EGFR-mutant lung cancer cell lines  
96 HCC827 and SH450 (Zheng et al., 2011) (Figure 1D and S1B). We found the  
97 drug-tolerance effect was most significant when cells were re-exposed to 50nM GEF but  
98 decreased with increasing drug concentration. Such TKI tolerance state could maintain  
99 over 2hrs after drug withdrawal and diminished gradually over time (Figure 1D). This  
100 tolerance was delicately regulated as when higher doses of GEF (0.1-1 $\mu$ M) were used for  
101 pre-treatment, no significant tolerance was detected (Figure S1C), which might be due to  
102 increased cytotoxicity of pre-treatment at such high concentration. Similar drug-tolerant  
103 state was also detected when cells were pre-treated with sublethal dose of erlotinib (ERL)  
104 (Figure S1D). Consistently, three cycles of TKI pre-treatment (each cycle contains  
105 sublethal drug treatment for 2 hrs followed by recovery in drug-free medium for additional 2  
106 hrs) rendered PC9 and HCC827 cells more resistant to subsequent GEF treatment (Figure  
107 1E-F). Remarkably, continuous sublethal GEF treatment for over three months conferred  
108 these cell lines with strong resistance to GEF. Hereafter, we referred to these Sublethal TKI  
109 Adapted Cells as STACs. e.g., STAC-P and STAC-H were derived from PC9 and HCC827  
110 cells, respectively (Figure 1G-H). The established STACs had significant increased IC<sub>50</sub>

111 value compared with parental cells *in vitro* (Figure S1E). Consistently, STAC-P xenograft  
112 tumors showed more resistance to GEF treatment than PC9 xenograft counterparts even at  
113 two-fold of regular dose (50 mg/kg daily) (Reagan-Shaw et al., 2008), despite comparable  
114 inhibition of EGFR phosphorylation (Figure 1I-J and S1F). Similarly, STAC-H xenograft  
115 tumors displayed more resistant to GEF than HCC827 xenograft controls (Figure S1G-H).  
116 Additionally, STAC exhibited cross-resistance to ERL (Figure 1K). Even drug withdrawal for  
117 over 70 passages, STAC still exhibited strong resistance to TKI (Figure 1L), indicating  
118 persistent drug resistance. Collectively, these results demonstrate that sublethal TKI  
119 treatment enables EGFR-mutant cancer cells to obtain a transient tolerant state through  
120 short-term treatment and persistent resistance to EGFR TKI through long-term treatment.

### 121 **Decreased H3K9 methylation Is Involved in TKI Resistance in STAC**

122 Next, we sought to examine the underlying mechanism responsible for EGFR TKI  
123 resistance in STAC. Several mechanisms have been proposed for TKI resistance (Rotow  
124 and Bivona, 2017). Nevertheless, neither EGFR T790M nor KRAS mutation was detected  
125 in STAC using amplification-refractory mutation system (ARMS) (Figure S2A). In addition,  
126 STAC and parental cells showed similar proliferation rate and cell cycle distribution (Figure  
127 S2B-C). Although phospho-RTK array identified several components of RTK pathways  
128 upregulated in STAC (Figure S2D), knockdown of these molecules individually failed to  
129 abrogate drug resistance of STAC (Figure S2E-F), indicating other mechanisms.

130 Previous studies reveal the importance of dysregulation of histone H3 methylation in TKI  
131 resistance (Guler et al., 2017; Sharma et al., 2010). We therefore evaluated a series of  
132 histone H3 methylation patterns in these TKI-resistance cells. Among the detected H3  
133 methylation, levels of H3K9me2 and H3K9me3 decreased most significantly in STACs  
134 (Figure 2A and S3A). Comparable decrease of H3K9me2 and H3K9me3 levels indicates  
135 that decreased methylation might occur at the step from H3K9me1 to H3K9me2. Histone  
136 methylation is dynamically controlled by methyltransferases and demethylases. We found  
137 that the activity of H3K9 methyltransferase, rather than its demethylase activity, was  
138 reduced in STACs (Figure 2B and S3B). Consistently, no significant changes of the

139 expression of H3K9 demethylases including JMJD family members (Lim et al., 2010) were  
140 observed between STAC and parental cells (Figure S3C), and knockdown of these  
141 demethylases individually failed to reverse STAC TKI resistance (Figure S3D-E). Notably,  
142 although no substantial differences in protein levels of G9a or SUV39H1, two known H3K9  
143 methyltransferases (Shinkai and Tachibana, 2011; Wang et al., 2012), were observed  
144 between STACs and parental counterparts (Figure S3F), knockdown of either enzyme  
145 conferred PC9 cells resistance to GEF without notable impact upon cell proliferation  
146 (Figure 2C-D and S3G). Similar results were also observed in HCC827 cells (Figure S3H-I).  
147 In addition, ectopic expression of shRNA-resistant G9a or SUV39H1 rendered G9a- or  
148 SUV39H1-knockdowned cells regained GEF sensitivity, respectively (Figure 2C-D and  
149 S3H-I), confirming that the gene knockdown effect upon drug response are on target.  
150 Similarly, treatment of PC9 or HCC827 cells with BIX01294, the H3K9 methyltransferase  
151 inhibitor (Janzen et al., 2010), promoted GEF resistance (Figure 2E and S3J). Conversely,  
152 ectopic expression of G9a or SUV39H1 alone partially restored GEF sensitivity in STACs  
153 (Figure 2F-G and S3K). Since DNA demethylation can also be regulated by the DNA  
154 demethylase TET (Wu and Zhang, 2017), we then evaluated the enzyme activity of TET by  
155 evaluating the levels of 5mC and 5hmC. As shown in Figure S4A-B, the levels of 5mC were  
156 unchanged between PC9 vs. STAC-P and HCC827 vs. STAC-H. Interestingly, the levels of  
157 5hmC were decreased in STAC-P and STAC-H when compared to their corresponding  
158 controls, indicating that TET activity is reduced in these drug-resistant cells. However,  
159 knockdown of TET1, TET2, or TET3 by shRNA had no major effect on GEF sensitivity in  
160 either parental cell lines or their STAC-derivatives (Figure S4C-G), indicating that TET may  
161 not be involved in mediating TKI resistance in this setting. Thus, these data reveal that  
162 STAC TKI resistance involves H3K9 demethylation.

### 163 **Epigenetically upregulated BCAT1 contributes to TKI resistance in STAC**

164 Demethylation of H3K9 is important for de-repression of target gene transcription  
165 (Metzger et al., 2005). We then explored which epigenetically regulated molecular events  
166 may be involved in mediating STAC TKI resistance. Integrative analyses of microarray and

167 RNA-seq data revealed 22 genes consistently upregulated in STAC (Figure 3A and S5A).  
168 Interestingly, individual knockdown of these genes identified BCAT1 as the top hit in  
169 reversing TKI resistance in STAC (Figure 3B and S5B). Indeed, BCAT1 was significantly  
170 upregulated in STACs both *in vitro* and *in vivo* (Figure 3C-D and S5C-E). In addition, the  
171 expression of BCAT1 increased while level of H3K9me2 decreased gradually during the  
172 establishment of STAC (Figure S5F), indicating the negative regulation of BCAT1  
173 expression by H3K9 methylation.

174 Next we performed chromatin immunoprecipitation (ChIP) assay and found that levels of  
175 both H3K9me2 and H3K9me3 at the *BCAT1* promoter were reduced in STACs as  
176 compared to parental controls (Figure 3E and S5G). In addition, we confirmed by ChIP that  
177 the binding of G9a and SUV39H1 to the *BCAT1* promoter region was also reduced in  
178 STACs relative to control cells (Figure 3F and S5H). Moreover, ChIP analysis of H3K9me2  
179 and H3K9me3 in PC9 cells confirmed that knockdown of G9a or SUV39H1 resulted in  
180 decreased H3K9me2/3 marks at the *BCAT1* promoter (Figure 3G-H). In parallel,  
181 knockdown of G9a or SUV39H1 in PC9 cells upregulated BCAT1 expression; conversely,  
182 ectopic expression of either enzyme in STAC-P did the opposite (Figure 3I-J). Similarly,  
183 BIX01294 treatment also reduced the H3K9me2/3 marks at the *BCAT1* promoter as  
184 revealed by ChIP analysis (Figure S5I), meanwhile increased BCAT1 expression in PC9  
185 cells (Figure 3K). Similar results were also obtained in HCC827/STAC-H cells (Figure  
186 S5J-L). These data suggest that upregulation of BCAT1 in STACs is potentially mediated  
187 through epigenetic derepression involving H3K9 demethylation on its promoter.

188 To determine the contribution of BCAT1 to TKI resistance of STAC, we depleted BCAT1  
189 expression using RNA interference. Notably, BCAT1 knockdown did not dramatically affect  
190 cell proliferation and xenograft tumor growth (Figure S6A-B) but significantly sensitized  
191 STAC-P, but not parental PC9 cells, to GEF treatment (Figure 3L-M). Meanwhile, STAC-P  
192 shBCAT1 cells restored GEF resistance after ectopic expression of shRNA-resistant  
193 BCAT1 (Figure 3L). Similarly, BCAT1 depletion also sensitized STAC-H cells to GEF  
194 (Figure S6C). Consistently, BCAT1 depletion rendered STACs xenograft tumors more



195 sensitive to GEF (Figure 3N-P and S6D-F). Importantly, ectopic expression of BCAT1  
196 alone indeed rendered PC9 and HCC827 cells more resistant to GEF both *in vitro* and *in*  
197 *vivo* (Figure S7).

198 To determine whether our findings from sublethal GEF treatment-induced resistance  
199 holds general meaning, we then treated PC9 cells with lethal dose of TKI following a  
200 previously established protocol (Hata et al., 2016), which is known to trigger multiple  
201 evolutionary paths of drug resistance. Through analyses of 27 established TKI-resistant  
202 subclones, we found three of them showing BCAT1 up-regulation with simultaneous  
203 H3K9me2/3 down-regulation (Figure S8A). In addition, ChIP-data confirmed that the  
204 chromatin occupancy of G9a and SUV39H1 as well as the levels of H3K9me2/3 marks at  
205 the *BCAT1* promoter were decreased in the three TKI-resistant subclones (Figure S8B-C).  
206 More importantly, BCAT1 knockdown also rendered these drug-resistant subclones more  
207 sensitive to GEF treatment (Figure S8D-F). To examine if the BCAT1-dependent  
208 mechanism of GEF resistance could also occur in the context of ERL, we established  
209 ERL-resistant PC9 cells (PC9-Erl-R) by continuous treatment of cells with sublethal dose  
210 ERL (10nM). As expected, PC9-Erl-R also exhibited increased expression of BCAT1 and  
211 strong resistance to ERL (Figure S9A-B). Moreover, knockdown of BCAT1 also sensitized  
212 PC9-Erl-R to ERL treatment (Figure S9B).

213 We further evaluated if the BCAT1-dependent mechanism is also relevant in targeted  
214 therapies other than EGFR inhibition. We treated ROS1-mutant HCC78 and ALK-mutant  
215 H2228 cells with sublethal dose of crizotinib continuously and established  
216 crizotinib-resistant HCC78 and H2228 cells (HCC78-Cri-R and H2228-Cri-R, respectively).  
217 Interestingly, we found that BCAT1 expression was also increased in both HCC78-Cri-R  
218 and H2228-Cri-R as compared to their parental controls (Figure S10A). Importantly,  
219 knockdown of BCAT1 also sensitized HCC78-Cri-R and H2228-Cri-R to crizotinib (Figure  
220 S10B-C). Taken together, these results demonstrate the importance of epigenetically  
221 upregulated BCAT1 in TKI resistance triggered via sublethal or lethal drug exposure.

## 222 **BCAT1 Orchestrates STAC TKI Resistance via ROS Scavenging**

223 To determine the downstream mechanism that mediates the effects of BCAT1 on STAC  
224 drug resistance, we employed gene expression profiling analysis and found that  
225 redox-related pathway including oxidative phosphorylation and glutathione (GSH)  
226 metabolism was significantly dysregulated in BCAT1 knockdown cells (Figure S11A-B;  
227 Table S1-3). GEF treatment could promote ROS accumulation in EGFR-mutant cancer  
228 cells (Okon et al., 2015), while no obvious ROS accumulation was observed in  
229 GEF-exposed STACs (Figure S11C-D). Similarly, significant decreased ROS accumulation  
230 was detected in STAC-P xenograft tumors compared with PC9 counterparts when treated  
231 with GEF, as indicated by reduced oxidative stress marker 8-Oxo-2'-deoxyguanosine  
232 (8-OXO) (Figure S11E-F). As expected, reduced ROS accumulation was seen in  
233 PC9-Erl-R compared with PC9 parental cells when treated with ERL (Figure S9C).  
234 Likewise, we found that HCC78-Cri-R and H2228-Cri-R also showed reduced ROS levels  
235 when compared to their parental controls in response to crizotinib treatment (Figure S10D).  
236 In contrast, BCAT1 depletion in STACs increased ROS levels following GEF treatment  
237 (Figure S11G-H). Moreover, ectopic expression of BCAT1 alone reduced ROS levels in  
238 both PC9 and HCC827 cells (Figure S11I-J). These data reveal the potential link between  
239 BCAT1 and ROS scavenging in STAC.

240 BCAT1 expression correlates with ROS level via generation of intermediate products that  
241 suppress oxidative stress (Zhang and Han, 2017). BCAT1-engaged BCAA metabolism  
242 mainly involves two distinct pathways with different end-products: one generates  
243 glutathione (GSH) for ROS scavenging by glutamate-cysteine ligase catalytic subunit  
244 (GCLC), the rate-limiting enzyme of GSH synthesis; and the other produces coenzyme A  
245 compounds by branched-chain keto acid dehydrogenase complex (BCKDH), which  
246 participates in TCA cycle (Figure 4A) (Lu, 2013). As expected, knockdown of GCLC, but  
247 not BCKDK or BCKDHA, reduced the intracellular GSH meanwhile increased ROS level in  
248 STACs (Figure S12A-C). Notably, despite no major changes in protein levels of these  
249 enzymes between STACs and controls (Figure S3F), knockdown of GCLC clearly  
250 sensitized STACs to GEF, whereas ectopic expression of shRNA-resistant GCLC rendered

251 GCLC-depleted cells regained GEF resistance, respectively (Figure 4B and S12D). Neither  
252 BCKDK nor BCKDHA knockdown had notable impact upon STAC TKI resistance (Figure  
253 S12E-H). More importantly, ectopic expression of GCLC completely blocked the effects of  
254 shBCAT1 on GEF resistance (Figure 4C), suggesting the requirement of GCLC in  
255 mediating BCAT1's action.

256 Since GCLC is involved in the biosynthesis of GSH, which serves as an  
257 important antioxidant to prevent oxidative damage caused by ROS, we then determined  
258 the role of GSH in BCAT1-mediated TKI resistance. Indeed, STACs cells displayed higher  
259 levels of GSH than their parental cells (Figure 4D and S12I). In addition, ectopic expression  
260 of BCAT1 alone increased intracellular GSH contents in both in PC9 and HCC827 cells  
261 (Figure 4E and S12J); and knockdown of BCAT1 in STACs markedly decreased  
262 intracellular GSH content (Figure 4F and S12K). Moreover, ectopic expression of  
263 shRNA-resistant BCAT1 or GCLC restored the GSH level in BCAT1-depleted STACs  
264 (Figure 4F and S12K). The contribution of BCAT1 expression to GSH synthesis was further  
265 confirmed by isotope tracing experiments (Figure S13). Consistently, BIX01294 treatment  
266 increased GSH content in PC9 and HCC827 cells (Figure 4G and S12L), and ectopic  
267 expression of SUV39H1 in STACs reduced intracellular GSH contents (Figure 4H and  
268 S12M). Since the ratio of GSH to GSSG is more indicative of the redox state of cells, we  
269 also measured the GSH/GSSG ratio in all these conditions and obtained similar results  
270 (Figure S14A-J). Further, treatment with ROS scavengers including N-acetyl cysteine  
271 (NAC), esterified GSH or L-glutamine as GSH supplement rendered PC9 cells more  
272 resistant to GEF treatment (Figure 4I-J and S14K-N). More importantly, both ectopic  
273 expression of GCLC and supplementation of NAC indeed rescued the shBCAT1 phenotype  
274 in STAC-P xenografts following GEF treatment (Figure 4K), suggesting that the  
275 sensitization of BCAT1 knockdown tumors to GEF is ROS-dependent. Collectively, these  
276 findings support the notion that BCAT1 contributes to STAC TKI resistance potentially  
277 through attenuation of ROS accumulation via GSH synthesis.

## 278 **Combination of GEF with ROS-Inducing Agents Overcomes STAC TKI Resistance**

279 To assess the translational significance, we treated STACs combining GEF with  
280 ROS-inducing agents. Small molecular inhibitors including Piperlongumine (PL) and  
281 Phenethyl Isothiocyanate (PEITC) are known to exert anti-tumor activities through  
282 promoting ROS accumulation (Liu et al., 2014; Xiao et al., 2010). Notably, combination of  
283 GEF with PL or PEITC effectively overcame STAC-P TKI resistance *in vitro* (Figure 5A-B  
284 and S15A). Consistently, only GEF and PL combinational treatment significantly inhibited  
285 STAC-P xenograft growth and cell proliferation with excessive ROS accumulation (Figure  
286 5C-F). Similar results were also observed in STAC-H cells (Figure S15B-C).

287 In addition, we established a patient-derived xenograft (PDX-resistant, PDX-R) from a  
288 patient who contained EGFR L858R mutation but showed EGFR TKI resistance.  
289 Interestingly, this PDX-R tumor showed higher BCAT1 expression compared with PDX-S  
290 (PDX-sensitive) tumor, which was sensitive to GEF treatment (Figure 5G). Similarly, only  
291 PL/GEF combinational treatment efficiently suppressed the PDX-R tumor growth, inhibited  
292 cell proliferation and promoted ROS accumulation (Figure 5H-J). To further verify our  
293 findings, we pharmacologically inhibited GSH synthesis using a more specific inhibitor,  
294 buthionine sulfoximine (BSO), which has been widely used *in vivo* with no observed toxicity  
295 and has a more specific mechanism of action. Indeed, BSO treatment sensitized STACs as  
296 well as PDX-R to GEF both *in vitro* and *in vivo*, which effects could be abolished by NAC  
297 supplementation (Figure 4K, 5K-L and S15D). Thus, these data suggest that combining TKI  
298 with ROS-inducing agents may be effective to overcome TKI resistance.

### 299 **Clinical Correlation of BCAT1 Expression with Therapeutic Response to EGFR TKI**

300 To evaluate the association between BCAT1 expression and EGFR TKI therapeutic  
301 response, we examined 119 human lung cancer specimens with TKI-sensitive EGFR  
302 mutations including 80 biopsy samples before TKI therapy (the baseline) and 39 TKI  
303 treatment relapsed samples (Table S4). Immunohistochemistry analysis revealed a  
304 negative correlation between BCAT1 and H3K9me2 or 8-OXO level (Figure 6A-C; Table  
305 S4). Importantly, BCAT1 expression were higher in the relapsed group than the baseline  
306 group (Figure 6D), while no major difference in *BCAT1* gene copy number was observed

307 (Figure S16). In the baseline group, high BCAT1 expression was associated with  
308 unfavorable therapeutic response to TKI treatment (Figure 6E and Table S5). Patients in  
309 the baseline group who had high-BCAT1 tumors had a shorter progression-free survival  
310 than those who had low-BCAT1 tumors (Figure 6F and Table S6). While patients in the  
311 relapsed group who did not harbor known genetic alterations, e.g., T790M mutation, MET  
312 or HER2 amplification, tended to have higher BCAT1 expression (Figure 6G). Together,  
313 these results support the correlation of BCAT1 expression with TKI response of patients  
314 with EGFR-mutant lung cancer.

## 315 **DISCUSSION**

316 Here we report that sublethal TKI exposure for 2 hours can elicit a transient drug tolerant  
317 state in EGFR-mutant lung cancer cells. Continuous sublethal TKI exposure reinforces this  
318 tolerance and establishes persistent drug resistance through a mechanism involving  
319 epigenetically regulated BCAA metabolic reprogramming that eliminates detrimental  
320 oxidative stress (Figure 6H). It has been shown that epigenetic regulation such as H3K4  
321 demethylation, contributes to EGFR TKI resistance triggered by lethal drug exposure  
322 through IGF-1R signaling. A recent work also proposes that lethal TKI exposure promotes  
323 drug resistance through chromatin repression via H3K9 and H3K27 methylation (Guler et  
324 al., 2017). We demonstrate that sublethal GEF exposure-induced drug resistance is  
325 potentially mediated through H3K9 demethylation. Of note, STACs established in our study  
326 are induced via continuous sublethal TKI treatment, whereas the drug-tolerant cells  
327 reported by others are established through lethal drug exposure (Guler et al., 2017;  
328 Sharma et al., 2010). The discrepancy of histone H3 methylation patterns in different  
329 TKI-resistant cells may be attributed to the different experimental systems employed. In  
330 clinical practice, patients are routinely given maximum tolerated dose of TKI and cancer  
331 evolves under sustained maximal therapeutic pressure. Interestingly, accumulative  
332 evidence has demonstrated that not all the tumor cells are evenly exposed to a lethal dose  
333 of drug and certain cancer cells may be exposed to sublethal doses of drug due to  
334 intratumoral heterogeneity resulting from complex tumor microenvironment that restrains  
335 drug diffusion and distribution (Fuso Nerini et al., 2014; Tredan et al., 2007). In fact, we did  
336 observe a heterogeneity of drug distribution within a single tumor and the activation of  
337 EGFR signaling was also highly heterogeneous in different regions of the EGFR-mutant  
338 GEF-resistant lung tumor samples (Figure S17). Our data suggest that sublethal exposure  
339 to TKI may instead enable tumor cells to develop adaptive programs to survive upon  
340 subsequent cytotoxic doses of targeted therapy.

341 We demonstrate that H3K9 demethylation contributes to STAC TKI resistance potentially  
342 through epigenetic upregulation of the BCAA catabolic enzyme BCAT1. Aberrant BCAT1

343 expression and BCAA metabolism has recently been documented to promote proliferation  
344 and progression of multiple malignancies (Hattori et al., 2017; Mayers et al., 2016; Tonjes  
345 et al., 2013). Although we cannot rule out the potential involvement of other genes in TKI  
346 resistance, our gain-of-function and loss-of-function experiments consistently support the  
347 notion that increased BCAT1 expression may be one of the important mechanisms  
348 underlying TKI resistance. Though our results were obtained from sublethal TKI-exposure  
349 model, we found that about 10% (3/27) of the TKI-resistant PC9 subclones established  
350 through lethal dose exposure also show reduced G9a and SUV39H1 binding and  
351 H3K9me2/3 marks at the *BCAT1* promoter with simultaneous BCAT1 upregulation and are  
352 indeed vulnerable to BCAT1 knockdown. These findings indicate that even during the lethal  
353 TKI treatment, a small fraction of tumor cells may evolve to become resistant via the  
354 mechanism similar to STACs, and that targeting BCAT1 may represent a potential  
355 therapeutic strategy to abrogate BCAT1-dependent drug resistance. The observations that  
356 crizotinib-resistant cells also harbored increased BCAT1 expression and that BCAT1  
357 depletion rendered them more sensitive to crizotinib indicate that the BCAT1-dependent  
358 mechanism that we described here might be, at least in part, relevant in several other TKI  
359 resistance settings in addition to EGFR TKI resistance.

360 Our data suggest the importance of BCAT1-mediated metabolic reprogramming for  
361 generating GSH in mediating STAC drug resistance, which is in accordance with previously  
362 reported effects of GSH and GCLC on therapeutic resistance (Benhar et al., 2016; Zheng  
363 et al., 2016). Importantly, combining ROS-inducing agents with TKI is effective to suppress  
364 tumor growth in both STACs xenograft and PDX models, raising the possibility that  
365 adjunctive therapies designed to induce ROS accumulation might provide a potential  
366 approach to improve EGFR TKI response. Of note, non-selective ROS-inducing agents that  
367 globally increase oxidants in cancer have limited therapeutic index due to excessive toxicity  
368 in sensitive tissues such as the liver and the nervous system, and many therapeutic  
369 approaches targeting intracellular ROS levels have yielded mixed results (Chio and  
370 Tuveson, 2017; Yang et al., 2018). Given the complicated role of ROS-inducing agents in



371 cancer therapy, more efforts are needed to verify the potential translational significance of  
372 our findings and search for specific inhibitors with less toxicity, e.g., those specifically target  
373 the BCAT1-engaged pathway other than non-selective ROS-inducing agents.

374 We observe an inverse correlation of BCAT1 expression with levels of H3K9me2 or  
375 oxidative stress in clinical tumor samples harboring EGFR mutations. Moreover, high  
376 BCAT1 expression is associated with unfavorable therapeutic response to EGFR TKI and  
377 shortened progression-free survival of EGFR-mutant patients, which is in agreement with  
378 our *in vitro* and *in vivo* findings. Taken together, our results identify a mechanism of EGFR  
379 TKI resistance involving adaptive response potentially through epigenetically regulated  
380 BCAT1-mediated metabolic reprogramming, which may contribute to a better  
381 understanding of the complexity and heterogeneity of drug resistance in clinic.

## 382 **LIMITATIONS OF STUDY**

383 Our data demonstrate that STAC maintains a low level of H3K9 methylation potentially  
384 through inhibition of H3K9 methyltransferase activities. How the activities of these  
385 methyltransferases are compromised in STACs requires future efforts to dissect into details.  
386 In addition, considering that acquired drug resistance may involve diverse molecular  
387 mechanisms that arise within same patient, it is currently impractical to define which human  
388 EGFR-mutant tumor develops TKI resistance through the mechanism reported here.

## 389 **STAR★METHODS**

390 Detailed methods are provided include the following:

- 391 ● **KEY RESOURCES TABLE**
- 392 ● **CONTACT FOR REAGENT AND RESOURCE SHARING**
- 393 ● **EXPERIMENTAL MODEL AND SUBJECT DETAILS**
  - 394 ○ Cell Culture Studies
  - 395 ○ Animal Studies
  - 396 ○ Human Samples
- 397 ● **METHOD DETAILS**



- 398 ○ Cell Proliferation Assay
- 399 ○ Cell Survival Assay
- 400 ○ TKI Pre-treatment Experiments
- 401 ○ Generation of Sublethal TKI Adapted Cells (STAC)
- 402 ○ Plasmid Construction and Virus Infection
- 403 ○ Gene Amplification Analyses
- 404 ○ Real-time PCR Analyses
- 405 ○ Western Blot Assay
- 406 ○ Immunohistochemical Staining
- 407 ○ H3K9 Methyltransferase Enzyme Activity Test
- 408 ○ Chromatin Immunoprecipitation Assay
- 409 ○ GSH Density Measurement
- 410 ○ Intracellular Reactive Oxygen Species (ROS) Detection
- 411 ○ UHPLC-qTOF-MS Analysis
- 412 ○ Quantification of [<sup>13</sup>C<sub>5</sub>]-Glutamate in Condition Medium
- 413 ○ Bioinformatics Analysis
- 414 ○ PDX Model Establishment
- 415 ○ Clinical Character Definition

416 ● **QUANTIFICATION AND STATISTICAL ANALYSIS**

417 ● **DATA AND SOFTWARE AVAILABILITY**

418 **SUPPLEMENTAL INFORMATION**

419 Supplemental Information includes 17 figures and 6 tables and can be found in the  
420 Supplemental files.

421 **ACKNOWLEDGEMENTS**

422 We are grateful for helpful comments and materials supports from Drs. Jeffrey A. Engelman,  
423 Degui Chen, Wenyi Wei and Qing Yan. This work was supported by the National Basic  
424 Research Program of China (grants 2017YFA0505501 to H.J. ); the Strategic Priority  
425 Research Program of the Chinese Academy of Sciences (grants XDB19020000 to H.J.);

426 the National Natural Science Foundation of China (grants 81430066 to H.J., 91731314 to  
427 H.J.,31621003 to H.J.,81872312 to H.J.,81871875 to L.H.,81802279 to H.H.); the Science  
428 and Technology Commission of Shanghai Municipality (grant 15XD1504000 to H.J.); and  
429 the China Postdoctoral Science Foundation (2016M601667 to H.H.).

#### 430 **AUTHOR CONTRIBUTIONS**

431 H.J. and Y.W. conceived the project. H.J., Y.W., J.Z., L.H. and D.S. designed  
432 experiments. Y.W., J.Z. and D.S. carried out most of the experiments and analyzed the  
433 data. S.R. and C.Z. provided and analyzed clinical samples. T.J. helped in ARMS analysis.  
434 Z.J., L.D., C.L. and L.C. helped in bioinformatics analysis. H.H., F.L., H.W., C.Z., K.W., L.Y.,  
435 Y.J., X.H., S.H., C.G., F.L., D.G., J.Q., and D.M.G. provided technical supports and  
436 comments. H.J., L.H., and Y.W. wrote the manuscript.

#### 437 **DECLARATION OF INTERESTS**

438 The authors declare no competing interests.

439

## 440 REFERENCES

- 441 Ananieva, E.A., and Wilkinson, A.C. (2018). Branched-chain amino acid metabolism in  
442 cancer. *Curr Opin Clin Nutr Metab Care* 21, 64-70.
- 443 Benhar, M., Shytaj, I.L., Stamler, J.S., and Savarino, A. (2016). Dual targeting of the  
444 thioredoxin and glutathione systems in cancer and HIV. *J Clin Invest* 126, 1630-1639.
- 445 Chio, I.I.C., and Tuveson, D.A. (2017). ROS in Cancer: The Burning Question. *Trends Mol*  
446 *Med* 23, 411-429.
- 447 Easwaran, H., Tsai, H.C., and Baylin, S.B. (2014). Cancer epigenetics: tumor heterogeneity,  
448 plasticity of stem-like states, and drug resistance. *Mol Cell* 54, 716-727.
- 449 Ericksen, R.E., Lim, S.L., McDonnell, E., Shuen, W.H., Vadiveloo, M., White, P.J., Ding, Z.,  
450 Kwok, R., Lee, P., Radda, G.K., et al. (2019). Loss of BCAA Catabolism during  
451 Carcinogenesis Enhances mTORC1 Activity and Promotes Tumor Development and  
452 Progression. *Cell Metab*.
- 453 Fuso Nerini, I., Morosi, L., Zucchetti, M., Ballerini, A., Giavazzi, R., and D'Incalci, M. (2014).  
454 Intratumor heterogeneity and its impact on drug distribution and sensitivity. *Clin Pharmacol*  
455 *Ther* 96, 224-238.
- 456 Guler, G.D., Tindell, C.A., Pitti, R., Wilson, C., Nichols, K., KaiWai Cheung, T., Kim, H.J.,  
457 Wongchenko, M., Yan, Y., Haley, B., et al. (2017). Repression of Stress-Induced LINE-1  
458 Expression Protects Cancer Cell Subpopulations from Lethal Drug Exposure. *Cancer Cell*  
459 32, 221-237 e213.
- 460 Hata, A.N., Niederst, M.J., Archibald, H.L., Gomez-Caraballo, M., Siddiqui, F.M., Mulvey,  
461 H.E., Maruvka, Y.E., Ji, F., Bhang, H.E., Krishnamurthy Radhakrishna, V., et al. (2016).  
462 Tumor cells can follow distinct evolutionary paths to become resistant to epidermal growth  
463 factor receptor inhibition. *Nat Med* 22, 262-269.
- 464 Hattori, A., Tsunoda, M., Konuma, T., Kobayashi, M., Nagy, T., Glushka, J., Tayyari, F.,  
465 McSkimming, D., Kannan, N., Tojo, A., et al. (2017). Cancer progression by reprogrammed  
466 BCAA metabolism in myeloid leukaemia. *Nature* 545, 500-504.
- 467 Holohan, C., Van Schaeybroeck, S., Longley, D.B., and Johnston, P.G. (2013). Cancer  
468 drug resistance: an evolving paradigm. *Nat Rev Cancer* 13, 714-726.
- 469 Janzen, W.P., Wigle, T.J., Jin, J., and Frye, S.V. (2010). Epigenetics: Tools and  
470 Technologies. *Drug Discov Today Technol* 7, e59-e65.
- 471 Lim, S., Metzger, E., Schule, R., Kirfel, J., and Buettner, R. (2010). Epigenetic regulation of  
472 cancer growth by histone demethylases. *Int J Cancer* 127, 1991-1998.
- 473 Liu, Q.R., Liu, J.M., Chen, Y., Xie, X.Q., Xiong, X.X., Qiu, X.Y., Pan, F., Liu, D., Yu, S.B.,  
474 and Chen, X.Q. (2014). Piperlongumine inhibits migration of glioblastoma cells via  
475 activation of ROS-dependent p38 and JNK signaling pathways. *Oxid Med Cell Longev*  
476 2014, 653732.
- 477 Lu, S.C. (2013). Glutathione synthesis. *Biochim Biophys Acta* 1830, 3143-3153.
- 478 Mayers, J.R., Torrence, M.E., Danai, L.V., Papagiannakopoulos, T., Davidson, S.M., Bauer,  
479 M.R., Lau, A.N., Ji, B.W., Dixit, P.D., Hosios, A.M., et al. (2016). Tissue of origin dictates  
480 branched-chain amino acid metabolism in mutant Kras-driven cancers. *Science* 353,  
481 1161-1165.

482 Metzger, E., Wissmann, M., Yin, N., Muller, J.M., Schneider, R., Peters, A.H., Gunther, T.,  
483 Buettner, R., and Schule, R. (2005). LSD1 demethylates repressive histone marks to  
484 promote androgen-receptor-dependent transcription. *Nature* *437*, 436-439.

485 Okon, I.S., Coughlan, K.A., Zhang, M., Wang, Q., and Zou, M.H. (2015). Gefitinib-mediated  
486 reactive oxygen specie (ROS) instigates mitochondrial dysfunction and drug resistance in  
487 lung cancer cells. *J Biol Chem* *290*, 9101-9110.

488 Reagan-Shaw, S., Nihal, M., and Ahmad, N. (2008). Dose translation from animal to human  
489 studies revisited. *FASEB J* *22*, 659-661.

490 Rotow, J., and Bivona, T.G. (2017). Understanding and targeting resistance mechanisms in  
491 NSCLC. *Nat Rev Cancer* *17*, 637-658.

492 Sharma, S.V., Lee, D.Y., Li, B., Quinlan, M.P., Takahashi, F., Maheswaran, S., McDermott,  
493 U., Azizian, N., Zou, L., Fischbach, M.A., et al. (2010). A chromatin-mediated reversible  
494 drug-tolerant state in cancer cell subpopulations. *Cell* *141*, 69-80.

495 Shinkai, Y., and Tachibana, M. (2011). H3K9 methyltransferase G9a and the related  
496 molecule GLP. *Genes Dev* *25*, 781-788.

497 Thewes, V., Simon, R., Hlevnjak, M., Schlotter, M., Schroeter, P., Schmidt, K., Wu, Y.,  
498 Anzeneder, T., Wang, W., Windisch, P., et al. (2017). The branched-chain amino acid  
499 transaminase 1 sustains growth of antiestrogen-resistant and ERalpha-negative breast  
500 cancer. *Oncogene* *36*, 4124-4134.

501 Thiagarajan, P.S., Wu, X., Zhang, W., Shi, I., Bagai, R., Leahy, P., Feng, Y., Veigl, M.,  
502 Lindner, D., Danielpour, D., et al. (2016). Transcriptomic-metabolomic reprogramming in  
503 EGFR-mutant NSCLC early adaptive drug escape linking  
504 TGFbeta2-bioenergetics-mitochondrial priming. *Oncotarget* *7*, 82013-82027.

505 Tonjes, M., Barbus, S., Park, Y.J., Wang, W., Schlotter, M., Lindroth, A.M., Pleier, S.V., Bai,  
506 A.H.C., Karra, D., Piro, R.M., et al. (2013). BCAT1 promotes cell proliferation through  
507 amino acid catabolism in gliomas carrying wild-type IDH1. *Nat Med* *19*, 901-908.

508 Tredan, O., Galmarini, C.M., Patel, K., and Tannock, I.F. (2007). Drug resistance and the  
509 solid tumor microenvironment. *J Natl Cancer Inst* *99*, 1441-1454.

510 Vander Heiden, M.G., and DeBerardinis, R.J. (2017). Understanding the Intersections  
511 between Metabolism and Cancer Biology. *Cell* *168*, 657-669.

512 Wang, T., Xu, C., Liu, Y., Fan, K., Li, Z., Sun, X., Ouyang, H., Zhang, X., Zhang, J., Li, Y., et  
513 al. (2012). Crystal structure of the human SUV39H1 chromodomain and its recognition of  
514 histone H3K9me2/3. *PLoS One* *7*, e52977.

515 Wu, X., and Zhang, Y. (2017). TET-mediated active DNA demethylation: mechanism,  
516 function and beyond. *Nat Rev Genet* *18*, 517-534.

517 Xiao, D., Powolny, A.A., Moura, M.B., Kelley, E.E., Bommarreddy, A., Kim, S.H., Hahm,  
518 E.R., Normolle, D., Van Houten, B., and Singh, S.V. (2010). Phenethyl isothiocyanate  
519 inhibits oxidative phosphorylation to trigger reactive oxygen species-mediated death of  
520 human prostate cancer cells. *J Biol Chem* *285*, 26558-26569.

521 Yang, H., Villani, R.M., Wang, H., Simpson, M.J., Roberts, M.S., Tang, M., and Liang, X.  
522 (2018). The role of cellular reactive oxygen species in cancer chemotherapy. *J Exp Clin*  
523 *Cancer Res* *37*, 266.

524 Zhang, L., and Han, J. (2017). Branched-chain amino acid transaminase 1 (BCAT1)  
525 promotes the growth of breast cancer cells through improving mTOR-mediated  
526 mitochondrial biogenesis and function. *Biochem Biophys Res Commun* *486*, 224-231.  
527 Zheng, C., Sun, Y.H., Ye, X.L., Chen, H.Q., and Ji, H.B. (2011). Establishment and  
528 characterization of primary lung cancer cell lines from Chinese population. *Acta Pharmacol*  
529 *Sin* *32*, 385-392.  
530 Zheng, Z.G., Xu, H., Suo, S.S., Xu, X.L., Ni, M.W., Gu, L.H., Chen, W., Wang, L.Y., Zhao,  
531 Y., Tian, B., et al. (2016). The Essential Role of H19 Contributing to Cisplatin Resistance by  
532 Regulating Glutathione Metabolism in High-Grade Serous Ovarian Cancer. *Sci Rep* *6*,  
533 26093.

534

535 **FIGURE LEGENDS**

536 **Figure 1. Sublethal EGFR TKI Treatment Induces Short-Term Tolerance and**  
537 **Long-Term Resistance In Human EGFR-Mutant Lung Cancer Cells.**

538 (A) PC9 cells were treated with different doses of GEF for 2 hrs and protein levels of  
539 pEGFR and total-EGFR were determined by western blot assay.  $\beta$ -actin was used as a  
540 loading control.

541 (B) Apoptosis of PC9 cells treated with indicated doses of GEF for 24 hrs by Annexin-V  
542 staining.

543 (C) Scheme for short-term sublethal GEF treatment experiments.

544 (D) Cells were exposed to sublethal GEF (10nM) for 2 hrs followed by recovery in drug-free  
545 medium with different times before re-exposed to indicated doses of GEF for 0.5 hr, and  
546 then cultured in drug-free medium for additional 72 hrs before MTT assay.

547 (E) Scheme for three cycles of short-term sublethal GEF treatment experiments. Each  
548 cycle contains exposure to sublethal GEF (10nM) for 2 hrs followed by recovery in  
549 drug-free medium for 2 hrs.

550 (F) Cells were exposed to three cycles of short-term sublethal GEF treatment before  
551 re-exposed to indicated doses of GEF for 0.5 hr, and then cultured in drug-free medium for  
552 additional 72 hrs before MTT assay.

553 (G) Scheme for the establishment of drug-resistant PC9 cells (STAC-P) using continuous  
554 sublethal GEF (10nM) treatment for over three months.

555 (H) MTT assay of different passages of PC9 cells continuously exposed to sublethal GEF  
556 treated with indicated doses of GEF for 72 hrs (left). MTT assay of HCC827 and STAC-H  
557 cells treated with indicated doses of GEF for 72 hrs (right).

558 (I) Growth curves of xenograft tumors derived from PC9 and STAC-P cells treated with or  
559 without GEF (50mg/kg) daily via intraperitoneal injection. (n=6 per group)

560 (J) Tumor weight for xenografts treated as in Figure 1I. Data were presented as mean  $\pm$   
561 SEM.

562 (K) MTT assay of PC9 and STAC-P cells treated with indicated doses of erlotinib (ERL) for  
563 72 hrs.

564 (L) MTT assay of STAC-P cells after GEF withdrawal for different passages treated with  
565 indicated doses of GEF for 72 hrs. DF, drug-free. \* $p < 0.05$ , \*\* $p < 0.01$ , \*\*\* $p < 0.001$ .

566 **Figure 2. Decreased H3K9 Methylation Is Involved in STAC TKI Resistance.**

567 (A) Cells were treated with or without sublethal GEF (10nM) for 2 hrs and lysates were  
568 subjected to western blot assay. Histone H3 and  $\beta$ -actin were used as loading controls.

569 (B) Histone methyltransferase (HMT) activities for H3K9 in indicated cells.

570 (C-D) MTT assay of PC9 cells with G9a knockdown or in combination with ectopic  
571 expression of shRNA-resistant G9a (C) or with SUV39H1 knockdown or in combination  
572 with ectopic expression of shRNA-resistant SUV39H1 (D) treated with indicated doses of  
573 GEF for 72 hrs.

574 (E) MTT assay of PC9 cells treated with DMSO or BIX01294 (1 $\mu$ M) together with indicated  
575 doses of GEF for 72 hrs.

576 (F-G) MTT assay of STAC-P cells with or without ectopic expression of G9a (F) or  
577 SUV39H1 (G) treated with indicated doses of GEF for 72 hrs. \* $p < 0.05$ , \*\*\* $p < 0.001$ .

578 **Figure 3. BCAT1 Knockdown Sensitizes STAC to GEF Treatment.**

579 (A) Plots showing the significantly dysregulated genes in STAC-P as compared to parental  
580 PC9 cells revealed by microarray and RNA-seq analyses. A total of 22 genes were  
581 indicated (21 in blue and BCAT1 in red).

582 (B) Growth inhibition rate of STAC-P cells with indicated gene knockdown were determined  
583 by MTT assay following GEF treatment (10nM) for 72 hrs.

584 (C-D) Relative mRNA (C) and protein (D) levels of BCAT1 in indicated cells.

585 (E) ChIP assay of the H3K9me2 or H3K9me3 enrichment on *BCAT1* promoter relative to  
586 immunoglobulin G (IgG) in indicated cells.

587 (F) ChIP assay of the G9a or SUV39H1 enrichment on *BCAT1* promoter relative to IgG in  
588 indicated cells.



589 (G-H) ChIP assay of the H3K9me2 or H3K9me3 enrichment on *BCAT1* promoter relative to  
590 IgG in PC9 cells with or without G9a (G) or SUV39H1 (H) knockdown.

591 (I) Protein levels of BCAT1 in PC9 cells with or without G9a or SUV39H1 knockdown.

592 (J) Protein levels of BCAT1 in STAC-P cells with or without ectopic expression of G9a or  
593 SUV39H1.

594 (K) Protein levels of BCAT1 in PC9 cells treated with DMSO or BIX01294 (1 $\mu$ M) for 24 hrs.

595 (L-M) MTT assay of STAC-P (L) or PC9 (M) cells with BCAT1 knockdown or in combination  
596 with ectopic expression of shRNA-resistant BCAT1 treated with indicated doses of GEF for  
597 72 hrs.

598 (N) Growth curves of xenograft tumors derived from STAC-P cells with BCAT1 knockdown  
599 or in combination with ectopic expression of shRNA-resistant BCAT1 following GEF  
600 treatment (50mg/kg) daily via intraperitoneal injection. (n=6 per group)

601 (O) Tumor weight for STAC-P xenografts treated as in Figure 3N. Plots were presented as  
602 mean  $\pm$  SEM.

603 (P) Representative immunohistochemical (IHC) staining of Ki-67 in STAC-P xenografts  
604 treated as in Figure 3N. Scale bar, 50 $\mu$ m. Statistical analyses of Ki-67 staining were  
605 presented as mean  $\pm$  SEM. \* $p$ <0.05, \*\* $p$ <0.01, \*\*\* $p$ <0.001.

606 **Figure 4. BCAA Metabolism Contributes to ROS Clearance and STAC Drug**  
607 **Resistance.**

608 (A) Scheme for BCAAs metabolism. (GCLC, glutamate-cysteine ligase catalytic subunit;  
609 BCKDK, branched-chain keto acid dehydrogenase complex; BCKDHA, branched chain  
610 keto acid dehydrogenase E1, alpha polypeptide; BCKA, branched-chain alpha-keto acid;  
611  $\alpha$ -KG,  $\alpha$ -ketoglutarate.)

612 (B) MTT assay of STAC-P cells with GCLC knockdown or in combination with ectopic  
613 expression of shRNA-resistant GCLC treated with indicated doses of GEF for 72 hrs.

614 (C) MTT assay of STAC-P cells with BCAT1 knockdown or in combination with ectopic  
615 expression of Vector (Vec) or GCLC treated with indicated doses of GEF for 72 hrs.

616 (D) GSH content of PC9 and STAC-P cells.



617 (E) GSH content in PC9 cells with or without ectopic BCAT1 expression.  
618 (F) GSH content of STAC-P cells with BCAT1 knockdown or in combination with ectopic  
619 expression of shRNA-resistant BCAT1 or GCLC.  
620 (G) GSH content in PC9 cells treated with DMSO or BIX01294 (1 $\mu$ M) for 24 hrs.  
621 (H) GSH content in STAC-P cells with or without ectopic SUV39H1 expression.  
622 (I-J) MTT assay of PC9 cells treated with or without NAC (5mM) (I) or Ethyl estered GSH  
623 (100 $\mu$ M) or L-glutamine (10mM) (J) together with indicated doses of GEF for 72 hrs.  
624 (K) Growth curves of xenograft tumors derived from STAC-P cells with BCAT1 knockdown  
625 or in combination with ectopic expression of GCLC or dietary supplementation of NAC  
626 (40mM in drinking water) or BSO (450 mg/kg, intraperitoneal injection) following GEF  
627 treatment (50mg/kg) every other day via intraperitoneal injection. (n=6 per group). Data  
628 were presented as mean  $\pm$  SEM. \* $p$ <0.05, \*\* $p$ <0.01, \*\*\* $p$ <0.001.

629 **Figure 5. Combined GEF and PL Treatment Overcomes STAC Drug Resistance.**

630 (A-B) MTT assay of STAC-P cells treated with or without PL (0.1 $\mu$ M) (A) or PEITC (1 $\mu$ M) (B)  
631 together with indicated doses of GEF for 72 hrs.  
632 (C) Growth curves of STAC-P xenograft tumors treated with GEF (3.25mg/kg), PL (3mg/kg),  
633 or both. (n=6 per group)  
634 (D) Tumor weight for STAC-P xenografts treated as in Figure 5C.  
635 (E-F) Percentage of Ki-67 (E) and 8-OXO (F) positive staining cells in STAC-P xenografts  
636 treated as in Figure 5C.  
637 (G) Representative IHC staining of BCAT1 in EGFR TKI sensitive PDX tumor (PDX-S) and  
638 TKI-resistant PDX tumor (PDX-R). Scale bar, 50 $\mu$ m.  
639 (H) Growth curves of PDX-R tumors treated with GEF (50mg/kg), PL (3mg/kg), or both.  
640 (n=6 per group)  
641 (I-J) Percentage of Ki-67 (I) and 8-OXO (J) positive staining cells in PDX-R tumors treated  
642 as in Figure 5H.  
643 (K) MTT assay of STAC-P cells treated with or without BSO (200 $\mu$ M) or NAC (5mM)  
644 together with indicated doses of GEF for 72 hrs.

645 (L) Growth curves of PDX-R tumors treated with GEF (50mg/kg), BSO (450 mg/kg,  
646 intraperitoneal injection) or dietary supplementation of NAC (40mM in drinking water). (n=6  
647 per group) Data were presented as mean  $\pm$  SEM. \* $p$ <0.05, \*\* $p$ <0.01, \*\*\* $p$ <0.001.

648 **Figure 6. Clinical Correlation Between BCAT1 Expression and EGFR TKI Resistance.**

649 (A) Representative IHC staining for BCAT1, H3K9me2, and 8-OXO in two human  
650 EGFR-mutant lung cancer specimens. Scale bar, 50 $\mu$ m.

651 (B-C) Kendall's tau correlation analyses of IHC staining for BCAT1 with H3K9me2 (B) or  
652 with 8-OXO (C) in human EGFR-mutant lung cancer specimens.

653 (D) Comparison of IHC score of BCAT1 expression in the baseline group and the relapsed  
654 group. Data were presented as mean  $\pm$  SEM.

655 (E) Percentage of patent response in the baseline samples according to BCAT1 expression  
656 status. (PR, partial response; SD, stable disease; and PD, progressive disease)

657 (F) Kaplan-Meier curves for progression-free survival of patients in the baseline group  
658 according to BCAT1 expression status.

659 (G) Comparison of IHC score of BCAT1 expression in the relapsed group with or without  
660 known genetic alterations. Data were presented as mean  $\pm$  SEM.

661 (H) A schematic diagram of BCAT1-mediated ROS scavenging in EGFR TKI resistance  
662 induced by continuous mild TKI treatment. \* $p$ <0.05, \*\* $p$ <0.01, \*\*\* $p$ <0.001.

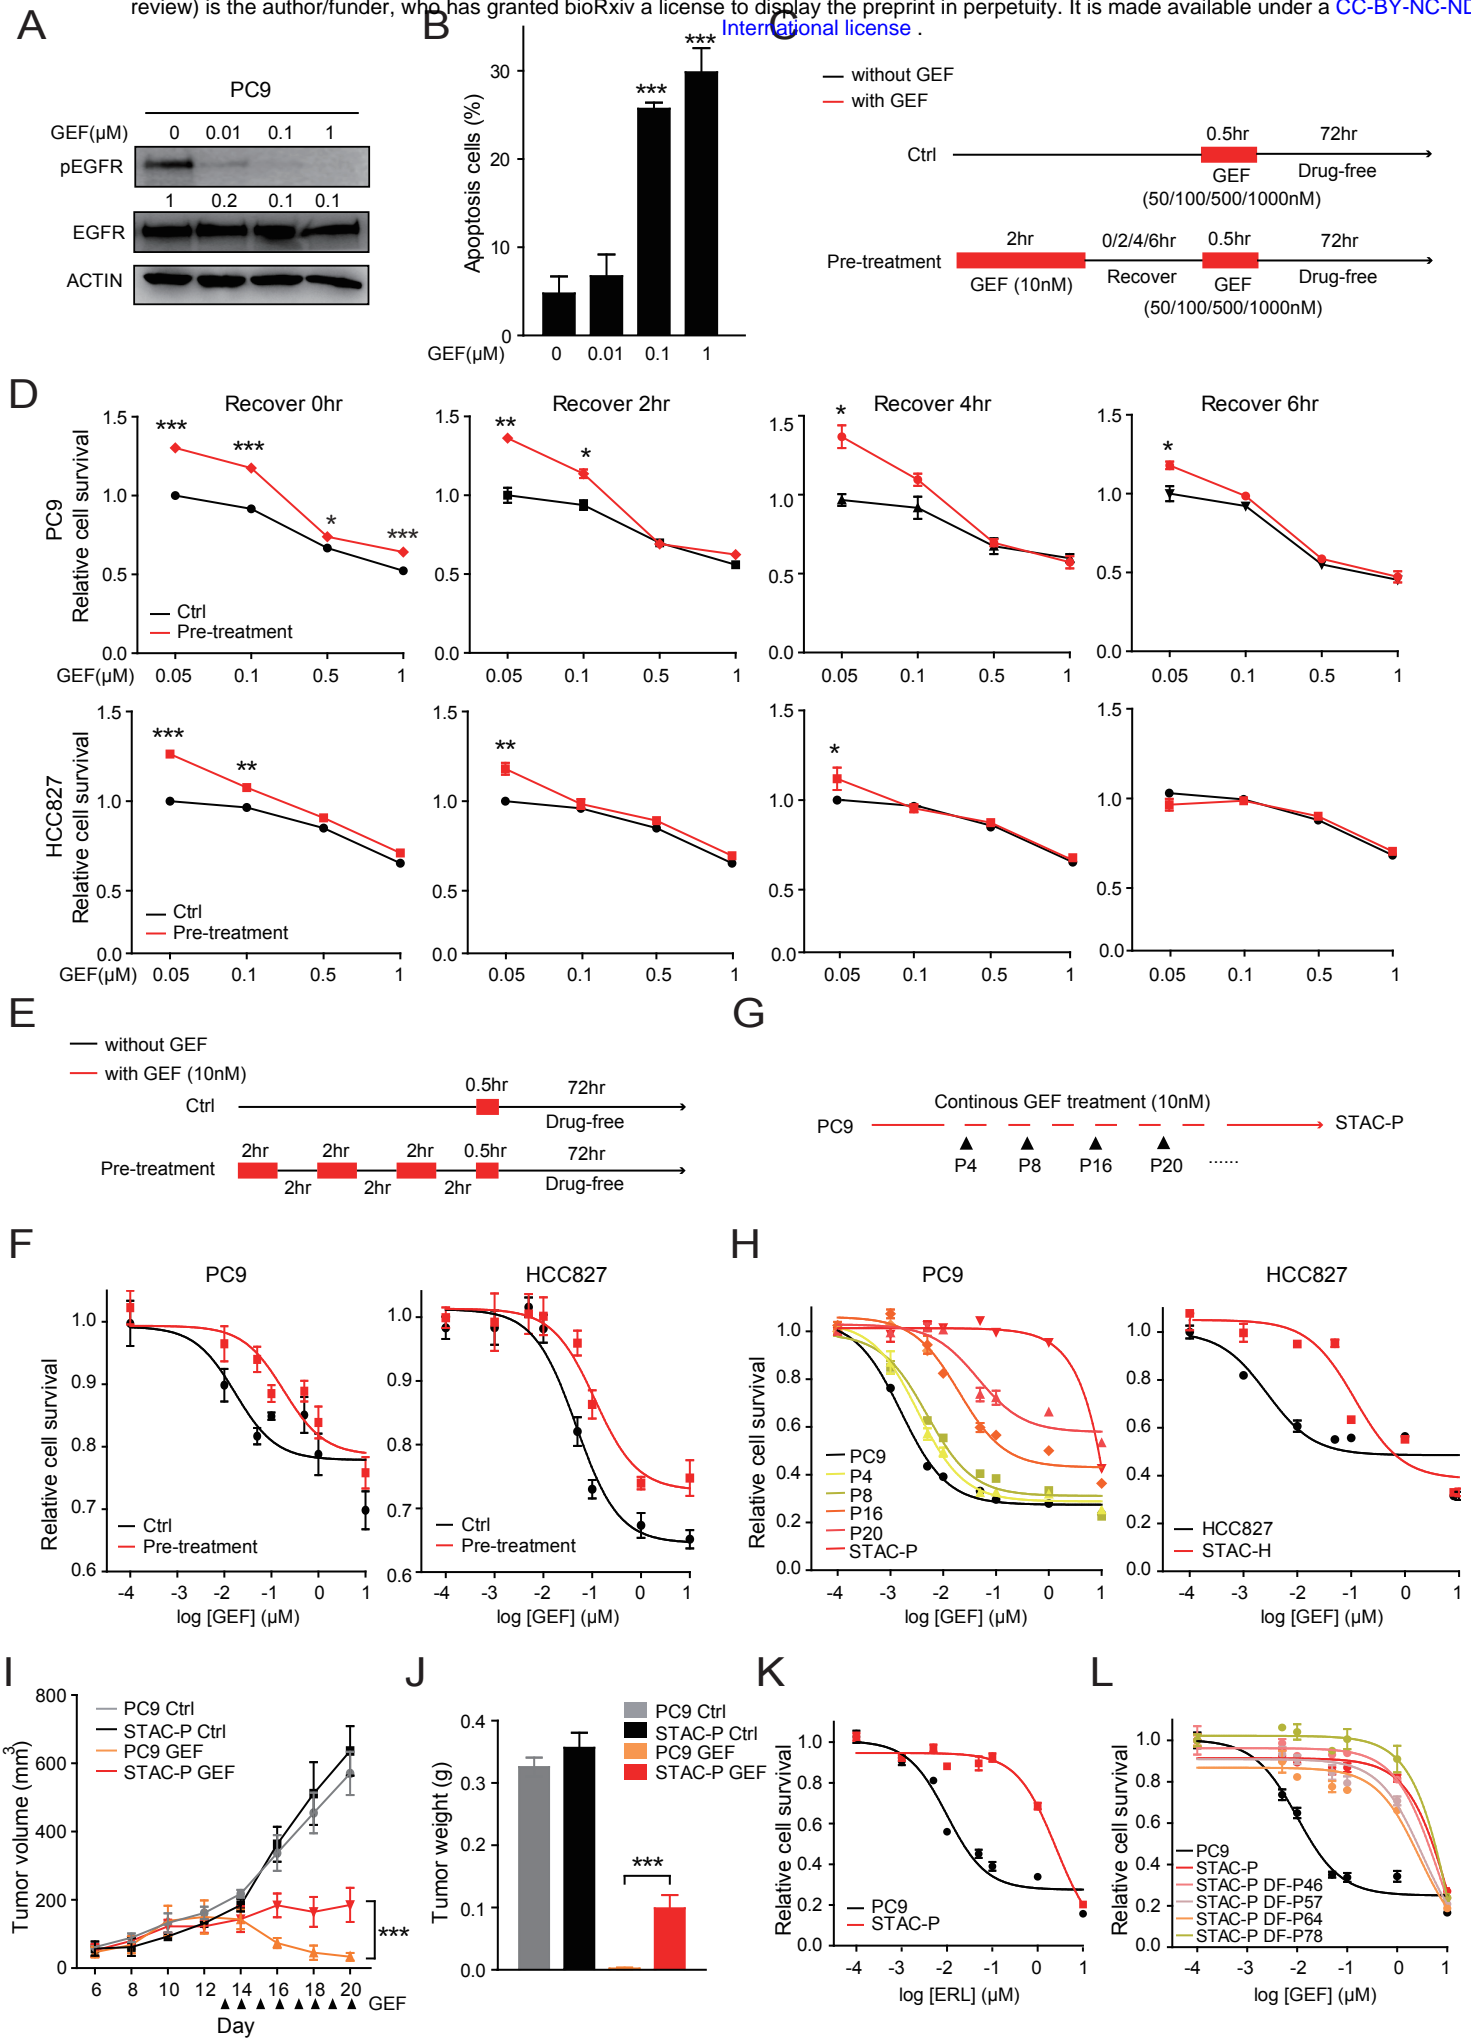

Figure 1

A

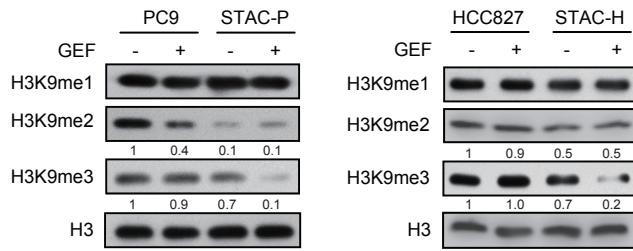

B

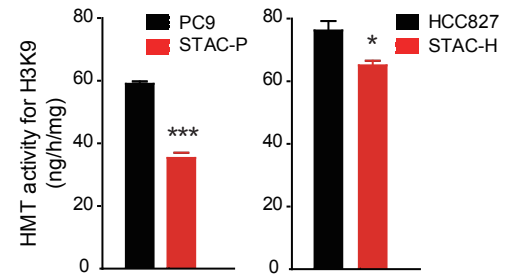

C

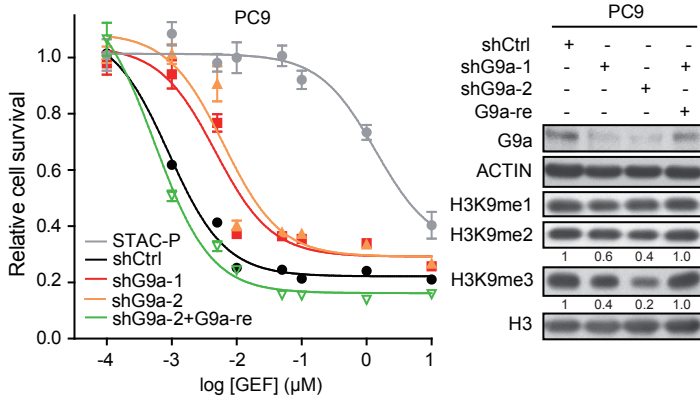

D

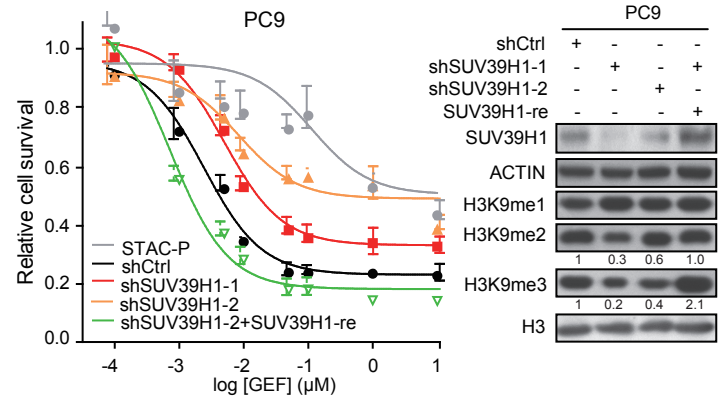

E

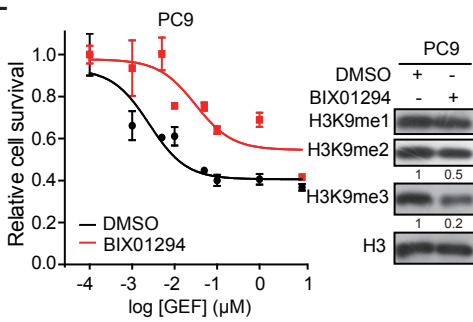

F

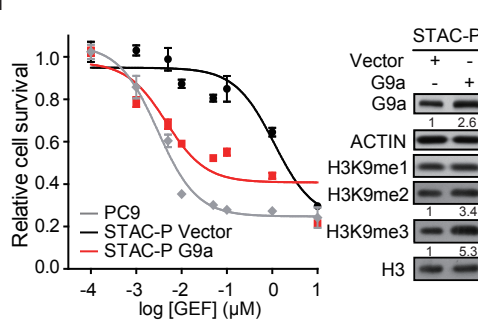

G

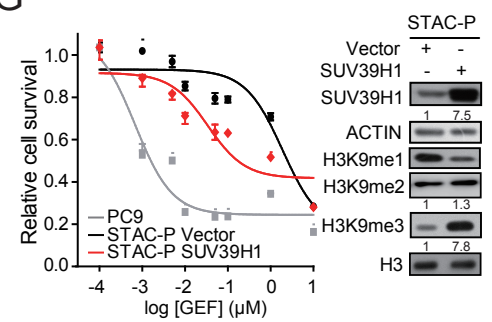

Figure 2

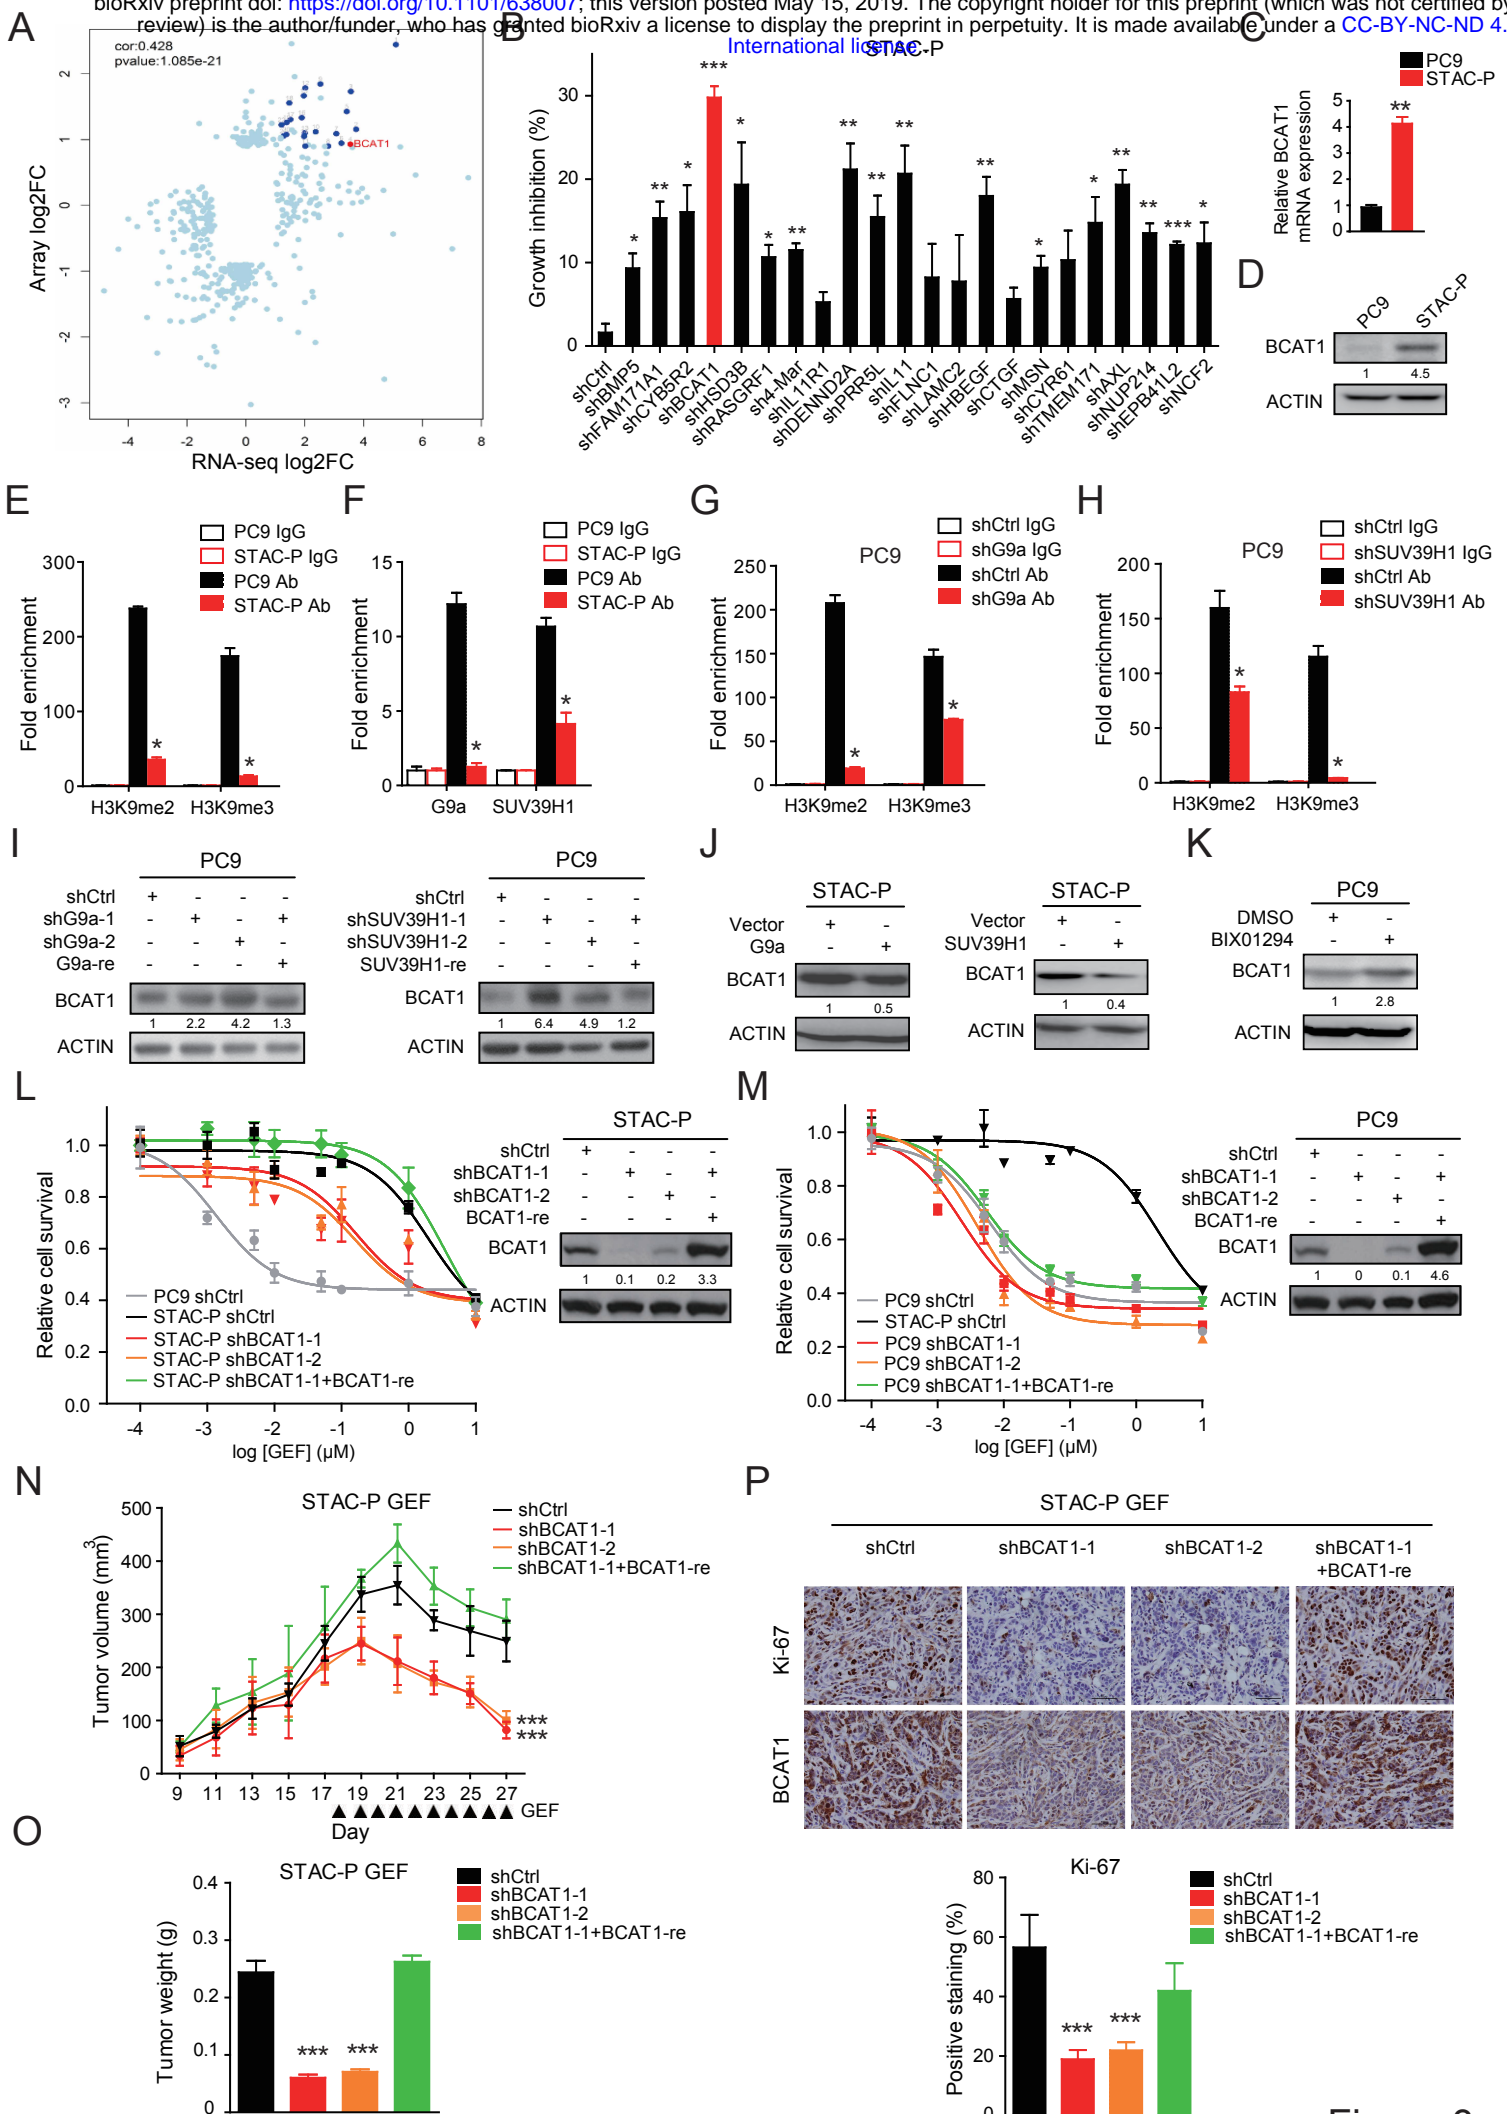

Figure 3

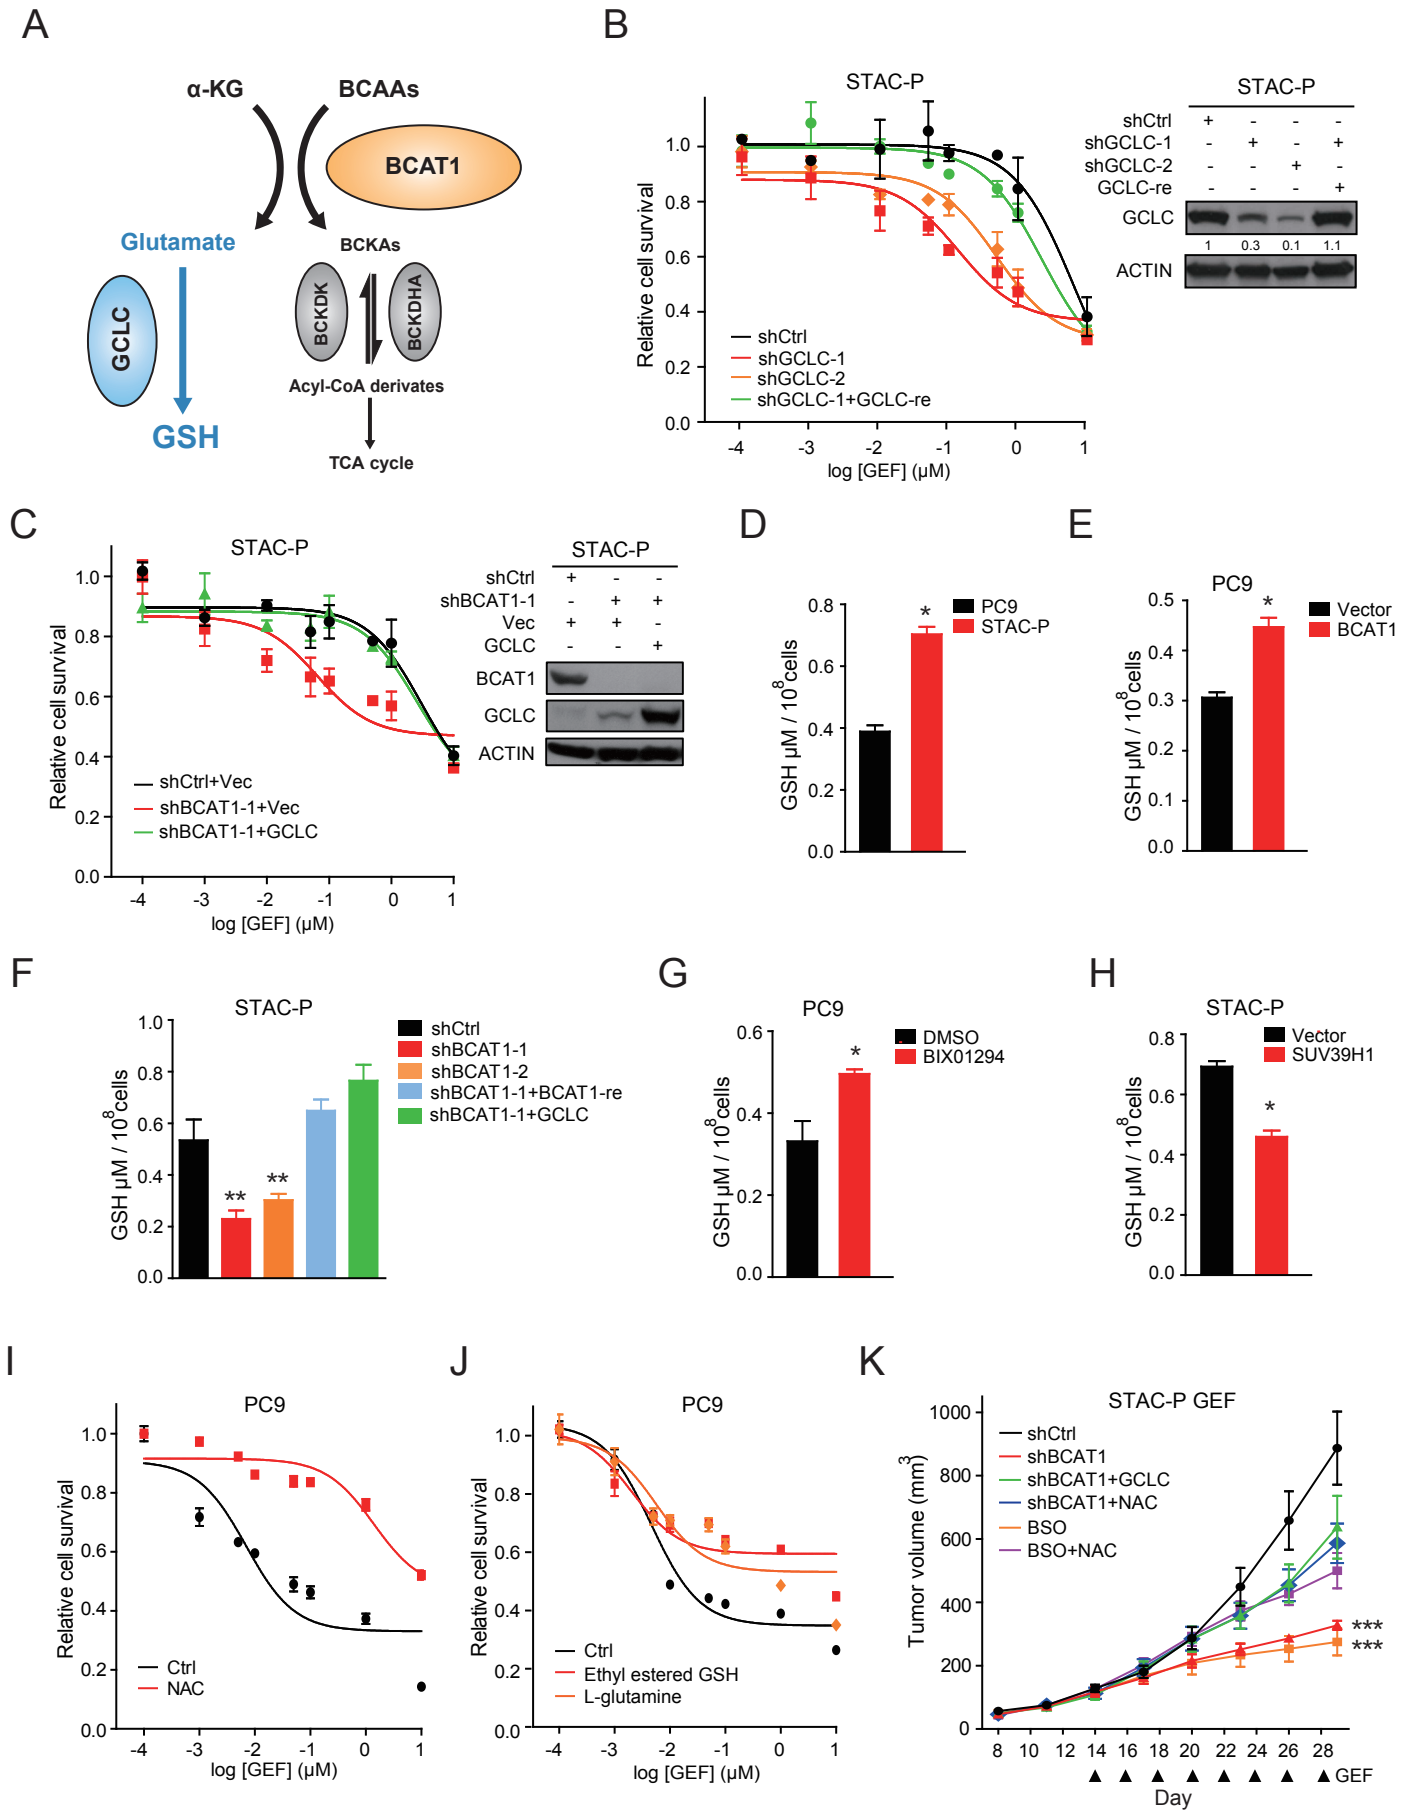

Figure 4



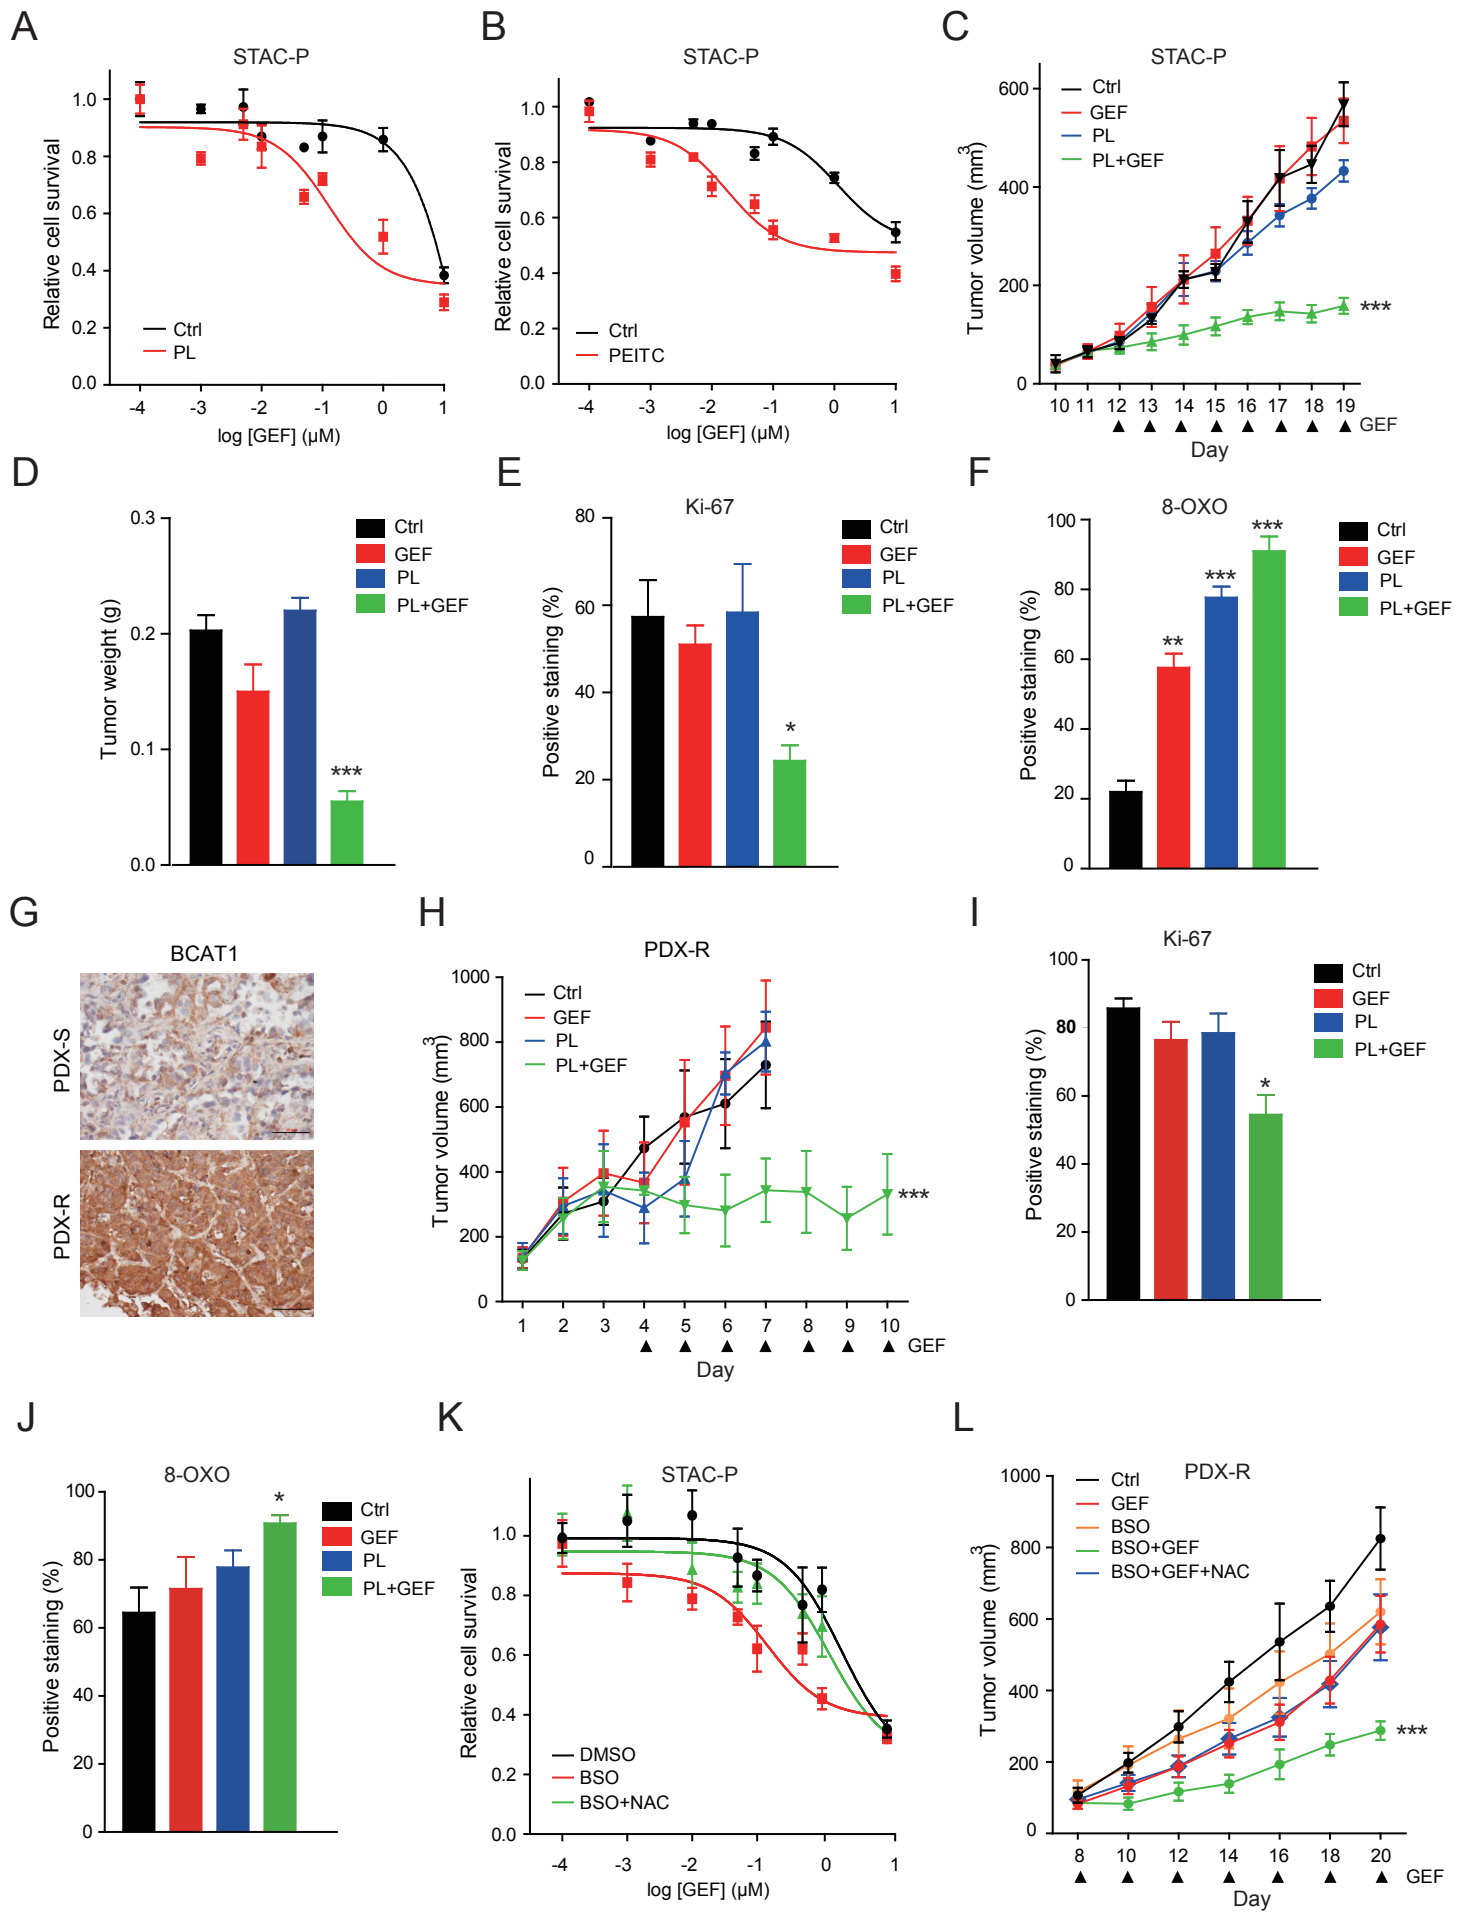

Figure 5

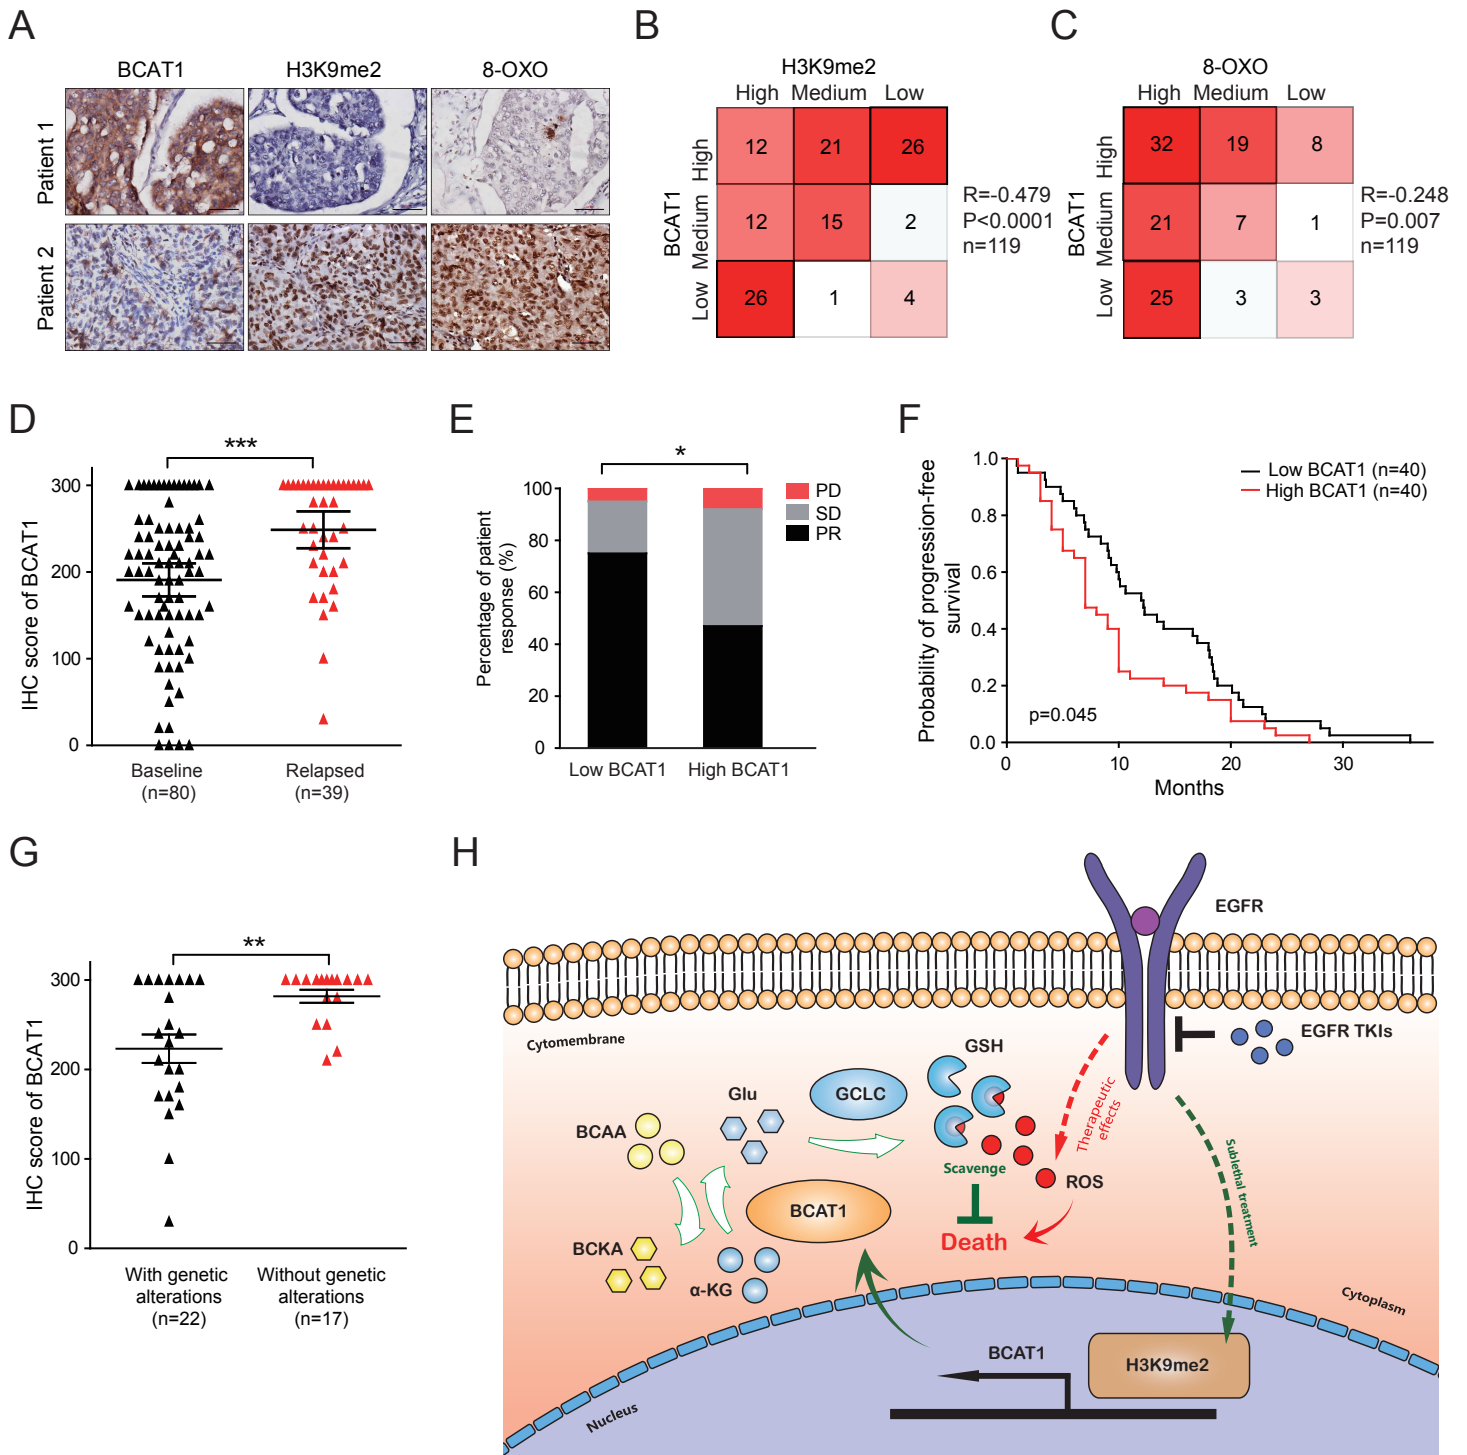

Figure 6
